# Supplementary material for: Facile synthesis of SnO2nanoparticle intercalated unzipped multi-walled carbon nanotubesviaan ultrasound-assisted route for symmetric supercapacitor devices
Source: Royal Society of Chemistry journal article supplement (doi:10.1039/d0se00702a), 2020-01-01
Supplement: d0se00702a1.pdf [file d0se00702a1.pdf]

## **Facile Synthesis of SnO<sub>2</sub> nanoparticles intercalated Unzipped Multi-Walled Carbon Nanotubes Via Ultrasound-Assisted Route for Symmetric Supercapacitor Devices†**

Murugesan Krishnaveni<sup>a</sup>, Jerry J. Wu<sup>b</sup>, Sambandam Anandan<sup>\*a</sup>, Muthupandian Ashokkumar<sup>c</sup>

### **Supporting information**

**Fig. S1** O-MWCNT + SnCl<sub>2</sub>.2H<sub>2</sub>O after 90 min sonication (a & b), 1-Pyrene carboxaldehyde + SnCl<sub>2</sub>.2H<sub>2</sub>O under 3hr sonication at N<sub>2</sub> atmosphere (c & d) respectively.

**Fig. S2** FT-IR spectra of 1- Pyrene carboxaldehyde/SnO<sub>2</sub>.

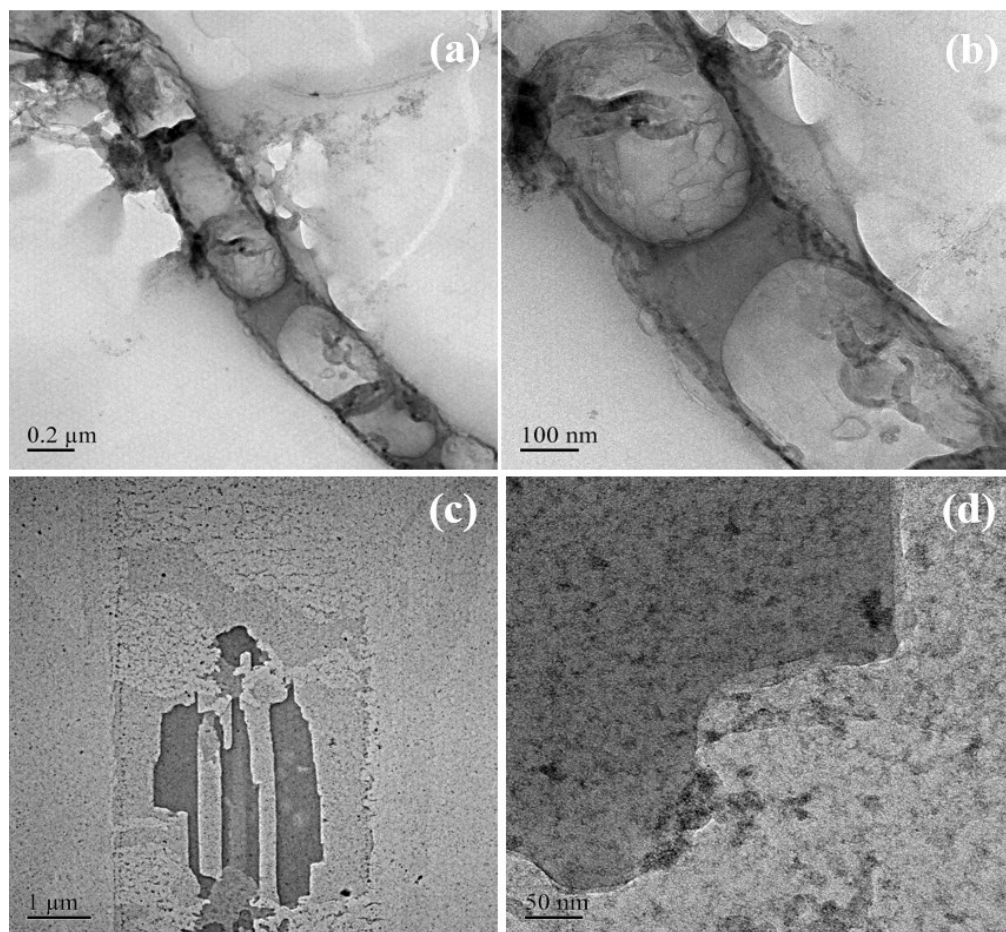

**Fig. S1** O-MWCNT + SnCl<sub>2</sub>·2H<sub>2</sub>O after 90 min sonication (a & b), 1-Pyrene carboxaldehyde + SnCl<sub>2</sub>·2H<sub>2</sub>O under 3hr sonication at N<sub>2</sub> atmosphere (c & d) respectively.

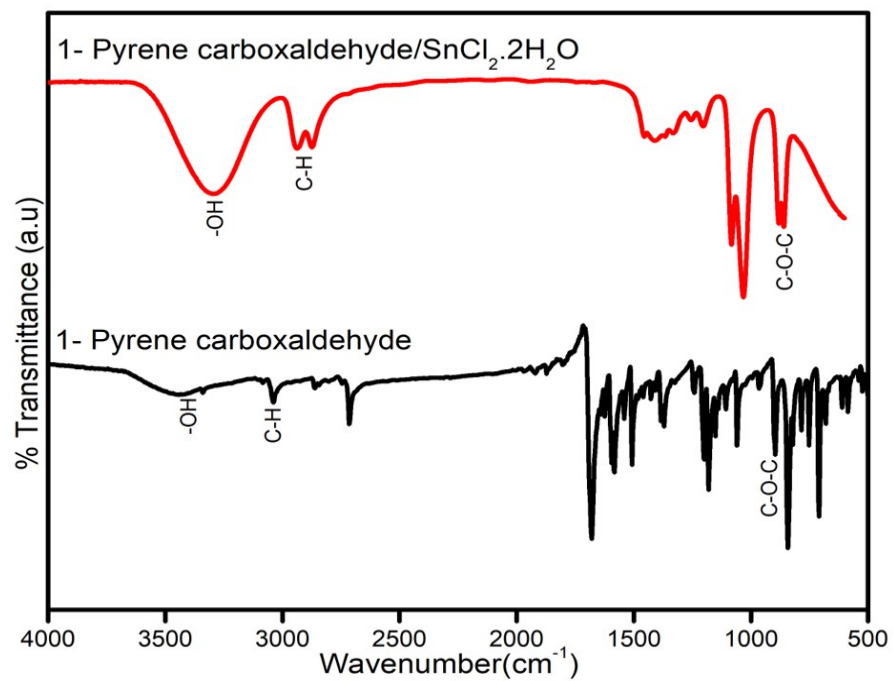

**Fig. S2** FT-IR spectra of 1- Pyrene carboxaldehyde/ $\text{SnO}_2 \cdot 2\text{H}_2\text{O}$ .
